# Supplementary material for: rhIL-7-hyFc and hIL-2/TCB2c combination promotes an immune-stimulatory tumor microenvironment that improves antitumor efficacy of checkpoint inhibitors
Source: PubMed Central journal article supplement — J Immunother Cancer. 2024 Mar 12;12(3):e008001. doi: 10.1136/jitc-2023-008001 (PMC10936464; doi:10.1136/jitc-2023-008001), 2024-03-12
Supplement: jitc-2023-008001supp001.pdf [file jitc-2023-008001supp001.pdf]

**Supplemental Figure 1****A**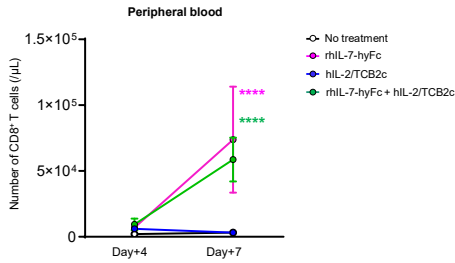**Supplemental Figure 1. Peripheral blood CD8<sup>+</sup> T cells from multiple groups of tumor-bearing mice. (A)**

Absolute counts of total CD8<sup>+</sup> T cells in peripheral blood at the indicated date post treatment (n=5 per group).

The asterisk (\*) expresses significance compared to the non-treated control. Data are expressed as mean  $\pm$

SD and analyzed by one-way ANOVA with Tukey's multiple comparisons test. Statistical significance is

indicated as \*p<0.05, \*\*p<0.01, \*\*\*p<0.001, \*\*\*\*p<0.0001.

## Supplemental Figure 2

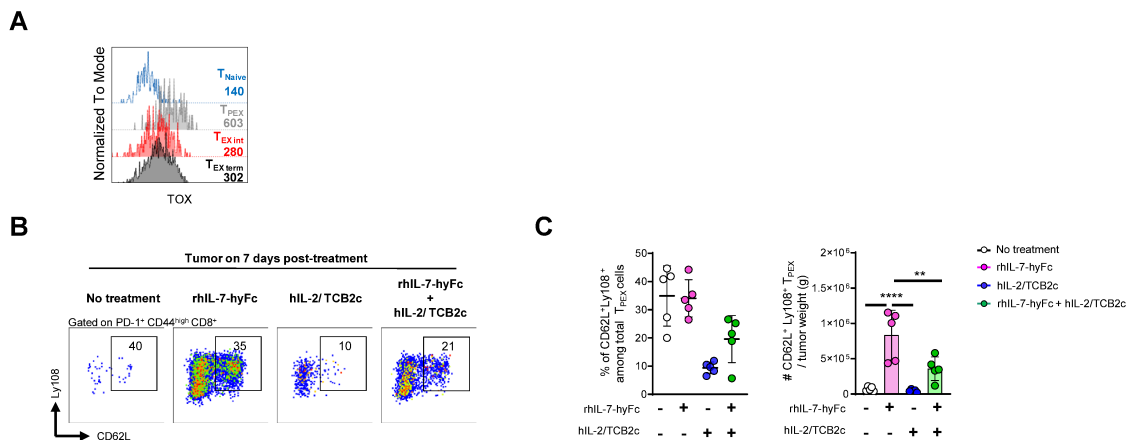Supplemental Figure 2. Characteristics of CD8<sup>+</sup> T<sub>PEX</sub> in the tumor microenvironment. (A)

Representative histograms showing TOX protein amounts in T<sub>Naive</sub>, T<sub>PEX</sub>, T<sub>EX int</sub>, and T<sub>EX term</sub> among CD8<sup>+</sup>

TIL from non-treated MC38 tumors. The numbers in histograms indicate the geometric MFI of TOX. (B)

Representative flow cytometry plots of CD62L<sup>+</sup> Ly108<sup>+</sup> T<sub>PEX</sub> among PD-1<sup>+</sup> CD44<sup>high</sup> CD8<sup>+</sup> TILs isolated from

MC38 tumor on 7 days post-treatment. (C) Percentages (left panel) and absolute numbers (right panel) of

CD62L<sup>+</sup> Ly108<sup>+</sup> T<sub>PEX</sub>. Absolute numbers were normalized to tumor weight in the four groups. Data are

presented as mean ± SD (n = 5 per group) and analyzed by one-way ANOVA with Tukey's multiple

comparisons test. Statistical significance is indicated as \*p < 0.05, \*\*p < 0.01, \*\*\*p < 0.001, \*\*\*\*p < 0.0001.

## Supplemental Figure 3

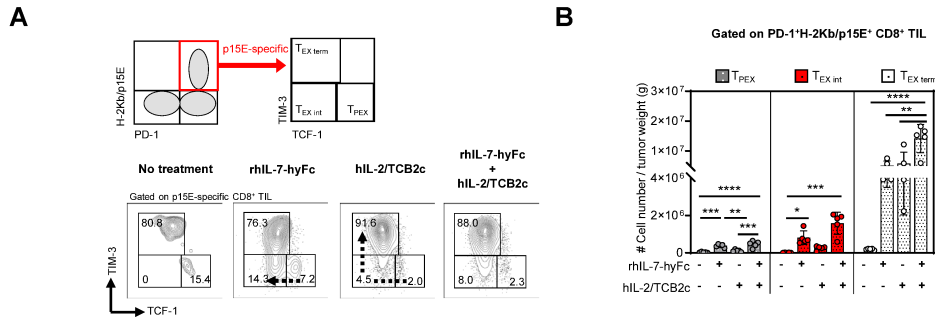

**Supplemental Figure 3. Phenotypic changes in p15E-specific CD8<sup>+</sup> T cells within MC38 tumors after treatments. (A)** Representative flow cytometry plots and **(B)** counts of T<sub>PEX</sub>, T<sub>EX int</sub>, T<sub>EX term</sub> among PD-1<sup>+</sup>p15E<sup>+</sup> CD8<sup>+</sup> TILs from MC38 tumors 7 days post-treatment. Intratumoral absolute numbers were normalized to tumor weight (g). The data are represented as the mean  $\pm$  SD (n = 5 in each group). Statistical significance is indicated as \*p<0.05, \*\*p<0.01, \*\*\*p<0.001, \*\*\*\*p<0.0001. T<sub>PEX</sub>, progenitor exhausted T cell. T<sub>EX int</sub>, intermediate exhausted T cell. T<sub>EX term</sub>, terminally exhausted T cell.

**Table S1. List of antibodies used for flow cytometry analysis**

| Antibody        | Fluorochrome    | Vendor         | Cat No.       | Clone        | Final dilution | Location               |
|-----------------|-----------------|----------------|---------------|--------------|----------------|------------------------|
| CD16/CD32       |                 | BioLegend      | 101302        | 93           | 1:100          | extracellular          |
| Live dead Blue  | UV              | Invitrogen     | L34962        | fixable blue | 1:500          | intracellular- unfixed |
| CD45            | BUV496          | BD             | 749889        | 30-F11       | 1:250          | extracellular          |
| TCR $\beta$     | BV650           | BioLegend      | 109251        | H57-597      | 1:100          | extracellular          |
| CD3             | BV650           | BioLegend      | 100229        | 17A2         | 1:100          | extracellular          |
| CD4             | APC/Fire 810    | BioLegend      | 100480        | GK1.5        | 1:250          | extracellular          |
| CD8 $\alpha$    | Alexa Fluor 532 | BD             | 58-0081-80    | 53-6.7       | 1:125          | extracellular          |
| CD11b           | BV510           | BD             | 562950        | M1/70        | 1:125          | extracellular          |
| NK1.1           | APC-eFluor780   | invitrogen     | 47-5941-82    | PK136        | 1:150          | extracellular          |
| CD62L           | BUV395          | BD             | 740218        | MEL-14       | 1:150          | extracellular          |
| CD27            | BUV661          | BD             | 741518        | LG3A10       | 1:100          | extracellular          |
| CD127           | BUV737          | BD             | 612841        | SB/199       | 1:60           | extracellular          |
| CD28            | BV421           | Biolegend      | 102127        | 37.51        | 1:50           | extracellular          |
| CD352 (Slamf6)  | Pacific Blue    | Biolegend      | 134608        | 300-AJ       | 1:100          | extracellular          |
| CD183 (CXCR3)   | BV480           | BD             | 746651        | CXCR3-173    | 1:25           | extracellular          |
| CD44            | BV570           | Biolegend      | 103037        | IM7          | 1:150          | extracellular          |
| Ly-6A/E (Sca-1) | BV605           | BD             | 563288        | D7           | 1:70           | extracellular          |
| CD366 (TIM-3)   | BV711           | BD             | 747622        | RMT3-23      | 1:60           | extracellular          |
| CD103           | BV750           | BD             | 747478        | M290         | 1:80           | extracellular          |
| CD226           | BV785           | Biolegend      | 133611        | Tx42.1       | 1:60           | extracellular          |
| Ly-6C           | PerCP           | Biolegend      | 128028        | HK1.4        | 1:150          | extracellular          |
| CD195 (CCR5)    | PerCP-e710      | Invitrogen     | 46-1951-82    | HM-CCR(7A4)  | 1:20           | extracellular          |
| H-2Kb-KSPWF TTL | PE              | Immudex        | JD3702-PE-150 |              | 1:20           | extracellular          |
| CD25            | PE-Cyanine5     | Invitrogen     | 15-0251-82    | PC61.5       | 1:100          | extracellular          |
| CD39            | PE-eFluor 610   | Invitrogen     | 61-0391-82    | 24DMS1       | 1:100          | extracellular          |
| CD69            | PE-cy7          | BioLegend      | 104512        | H1.2F3       | 1:60           | extracellular          |
| PD-1            | APC             | BioLegend      | 135210        | 29F.1A12     | 1:50           | extracellular          |
| TIGIT           | APC-R700        | BD             | 556474        | 1G9          | 1:60           | extracellular          |
| Ki-67           | BV421           | BioLegend      | 151208        | 11F6         | 1:250          | intracellular          |
| FoxP3           | Pacific blue    | BioLegend      | 126410        | MF-14        | 1:125          | intracellular          |
| TCF-1           | Alexa Fluor 488 | Cell signaling | 6444          | C63D9        | 1:100          | intracellular          |
| Granzyme B      | PE-Cyanine5.5   | Invitrogen     | GRB18         | GB11         | 1:250          | intracellular          |
| TNF- $\alpha$   | APC             | Invitrogen     | 17-7321-82    | MP6-XT22     | 1:200          | intracellular          |
| IFN- $\gamma$   | PE-Cyanine7     | Invitrogen     | 25-7311-82    | XMG1.2       | 1:200          | intracellular          |
